# Supplementary material
Source: publisher site journal article supplement (https://www.dovepress.com/article/332612)
Supplement: Supplementary file 1 [file get_supplementary_file.php]

Supplementary table 1. Univariate and multivariate analyses of clinical variables and lymph node characteristics for prediction of tumor recurrence in patients with lymph node metastasis.

| Variables | Univariate analysis | | | Multivariate analysis | | |
| --- | --- | --- | --- | --- | --- | --- |
|  | HR | 95% CI | *P* | HR | 95% CI | *P* |
| Age (years)  ≤ 40 vs. > 40 | 0.826 | 0.193–3.544 | 0.7973 |  |  |  |
| Stage  ≥ IB2 vs. IB1 | 2.504 | 0.746–8.402 | 0.1372 |  |  |  |
| Histology  AC/ASC vs. SCC | 3.906 | 1.107–13.787 | 0.0342 |  |  |  |
| Tumor size  > 2 cm vs. ≤ 2 cm | 2.213 | 0.535–9.157 | 0.2732 |  |  |  |
| Lymphovascular invasion | 0.443 | 0.106–1.850 | 0.2644 |  |  |  |
| Parametrial invasion | 1.321 | 0.389–4.487 | 0.6552 |  |  |  |
| Positive margin | 0.973 | 0.283–3.343 | 0.9728 |  |  |  |
| Total LN counts  ≤ 30 vs. > 30 | 2.046 | 0.469–8.928 | 0.3407 |  |  |  |
| Total positive LN counts  > 1 vs. 1 | 2.545 | 0.771–8.406 | 0.125 |  |  |  |
| LNR  > 0.0625 vs. ≤ 0.0625 | 7.213 | 2.090–24.898 | 0.0018 | 7.795 | 1.679–36.182 | 0.0087 |
| Level of LN dissection  Pelvis vs. + low paraaortic  Pelvis vs. + extended | 5.398  1.984 | 0.739–39.456  0.481–8.185 | 0.0966  0.3436 |  |  |  |

AC = adenocarcinoma;ASC = adenosqumous carcinoma; CI = confidence interval; HR = hazard ratio; LN = lymph node; LNR = lymph node ratio; SCC squamous cell carcinoma.

Supplementary table 2. Univariate and multivariate analyses of clinical variables and lymph node characteristics for prediction of death in patients with lymph node metastasis.

| Variables | Univariate analysis | | | Multivariate analysis | | |
| --- | --- | --- | --- | --- | --- | --- |
|  | HR | 95% CI | *P* | HR | 95% CI | *P* |
| Age (years)  ≤ 40 vs. > 40 | 0.779 | 0.101–6.006 | 0.8109 |  |  |  |
| Stage  ≥ IB2 vs. IB1 | 4.730 | 0.799–27.997 | 0.0867 |  |  |  |
| Histology  AC/ASC vs. SCC | 1.336 | 0.208–8.589 | 0.7604 |  |  |  |
| Tumor size  > 2 cm vs. ≤ 2 cm | 2.184 | 0.438–10.891 | 0.3407 |  |  |  |
| Lymphovascular invasion | 0.076 | 0.008–0.696 | 0.0226 |  |  |  |
| Parametrial invasion | 1.091 | 0.179–6.657 | 0.9520 |  |  |  |
| Positive margin | 1.142 | 0.186–7.023 | 0.8864 |  |  |  |
| Total LN counts  ≤ 30 vs. > 30 | 1.035 | 0.118–9.070 | 0.9752 |  |  |  |
| Total positive LN counts  > 1 vs. 1 | 1.850 | 0.962–3.556 | 0.0651 |  |  |  |
| LNR  > 0.0625 vs. ≤ 0.0625 | 2.412 | 0.400–14.551 | 0.3370 |  |  |  |
| Level of LN dissection  Pelvis vs. + low paraaortic  Pelvis vs. + extended | 8.003  1.395 | 0.611–104.791  0.140–13.919 | 0.1130  0.7765 |  |  |  |

AC = adenocarcinoma;ASC = adenosqumous carcinoma; CI = confidence interval; HR = hazard ratio; LN = lymph node; LNR = lymph node ratio; SCC squamous cell carcinoma.

Supplementary table 3. Univariate and multivariate analyses of clinical variables and lymph node characteristics for prediction of tumor recurrence in patients without lymph node metastasis.

| Variables | Univariate analysis | | | Multivariate analysis | | |
| --- | --- | --- | --- | --- | --- | --- |
|  | HR | 95% CI | *P* | HR | 95% CI | *P* |
| Age (years)  ≤ 40 vs. > 40 | 2.685 | 0.956–7.537 | 0.0608 |  |  |  |
| Stage  ≥ IB2 vs. IB1 | 1.964 | 0.744–5.184 | 0.173 |  |  |  |
| Histology  AC/ASC vs. SCC | 1.130 | 0.474–2.693 | 0.7823 |  |  |  |
| Tumor size  > 2 vs. ≤ 2 cm | 1.580 | 0.703–3.549 | 0.2679 |  |  |  |
| Lymphovascular invasion | 0.818 | 0.3226–2.075 | 0.8182 |  |  |  |
| Deep stromal invasion | 1.619 | 0.699–3.753 | 0.2611 |  |  |  |
| Parametrial invasion | 1.251 | 0.257–6.094 | 0.7820 |  |  |  |
| Positive margin | 7.841 | 1.888–32.560 | 0.0046 | 3.544 | 1.391–9.030 | 0.0080 |
| Total LN counts  ≤ 30 vs. > 30 | 0.681 | 0.301–1.546 | 0.3586 |  |  |  |
| Level of LN dissection  Pelvis vs. + low paraaortic  Pelvis vs. + extended | 1.940  1.805 | 0.604–6.229  0.694–4.700 | 0.2654  0.2259 |  |  |  |

AC = adenocarcinoma;ASC = adenosqumous carcinoma; CI = confidence interval; HR = hazard ratio; LN = lymph node; SCC squamous cell carcinoma.

Supplementary table 4. Univariate and multivariate analyses of clinical variables and lymph node characteristics for prediction of death in patients without lymph node metastasis.

| Variables | Univariate analysis | | | Multivariate analysis | | |
| --- | --- | --- | --- | --- | --- | --- |
|  | HR | 95% CI | *P* | HR | 95% CI | *P* |
| Age (years)  ≤ 40 vs. > 40 | 2.593 | 1.488–13.872 | 0.2655 |  |  |  |
| Stage  ≥ IB2 vs. IB1 | 2.093 | 0.420–10.424 | 0.3671 |  |  |  |
| Histology  AC/ASC vs. SCC | 4.689 | 1.163–18.909 | 0.0299 | 4.117 | 1.029–16.477 | 0.0455 |
| Tumor size  > 2 vs. ≤ 2 cm | 1.530 | 0.410–5.702 | 0.5265 |  |  |  |
| Lymphovascular invasion | 3.045 | 0.660–14.058 | 0.1536 |  |  |  |
| Deep stromal invasion | 1.023 | 0.254–4.127 | 0.9748 |  |  |  |
| Parametrial invasion | 3.997 | 0.186–85.990 | 0.3761 |  |  |  |
| Positive margin | 1.799 | 0.142–22.853 | 0.6509 |  |  |  |
| Total LN counts  ≤ 30 vs. > 30 | 0.662 | 0.171–2.559 | 0.5497 |  |  |  |
| Level of LN dissection  Pelvis vs. + low paraaortic  Pelvis vs. + extended | 1.712  2.193 | 0.247–11.874  0.388–12.379 | 0.5866  0.3740 |  |  |  |

AC = adenocarcinoma;ASC = adenosqumous carcinoma; CI = confidence interval; HR = hazard ratio; LN = lymph node; SCC squamous cell carcinoma.
